# Supplementary material for: Use of Wearable Devices in Individuals With or at Risk for Cardiovascular Disease in the US, 2019 to 2020
Source: PubMed Central journal article supplement (PMC10248745; doi:10.1001/jamanetworkopen.2023.16634), 2023-06-07
Supplement: jamanetwopen-e2316634-s001.pdf [file jamanetwopen-e2316634-s001.pdf]

## Supplementary Online Content

Dhingra LS, Aminorroaya A, Oikonomou EK, et al. Use of wearable devices in individuals with or at risk for cardiovascular disease in the US, 2019 to 2020. *JAMA Netw Open*. 2023;6(6):e2316634. doi:10.1001/jamanetworkopen.2023.16634

**eMethods.** Details About Health Information National Trends Survey (HINTS) 2019 and 2020

**eFigure.** Use of Wearables Among US Adults With Cardiovascular Disease or Cardiovascular Risk Factors Before and After Adjustment for Sociodemographic Differences

**eTable 1.** Demographic Characteristics, Cardiovascular Disease, and Cardiovascular Risk Factors in Health Information National Trends Survey Respondents, 2019 and 2020

**eTable 2.** Demographic Distribution of Wearable Use in Individuals With or at Risk of Cardiovascular Disease

**eTable 3.** Frequency of Use in Participants Using Wearable Devices

**eTable 4.** Univariable Demographic Predictors of Wearable Device Use in Individuals With Cardiovascular Disease

**eTable 5.** Multivariable Models for Wearable Device Use in Individuals With Cardiovascular Disease

**eTable 6.** Multivariable Models for Wearable Device Use in Individuals at Risk of Cardiovascular Disease

**eTable 7.** Distribution of Demographic Characteristics, Cardiovascular Risk Factors, and Socioeconomic Features Based on Willingness to Share Wearable Device Health Data With Clinicians in Participants With or at Risk of Cardiovascular Disease

This supplementary material has been provided by the authors to give readers additional information about their work.

**eMethods.** Details About Health Information National Trends Survey (HINTS) 2019 and 2020

Cycle 3 of HINTS 5 was conducted from January to April 2019, via an online web pilot survey and via mail-in surveys. The response rates for the paper-only mail-in survey and the web pilot survey were 30.2% and 30.6%, respectively. HINTS 5 Cycle 4 was conducted from February to June 2020, via a paper-only mail-in survey. The response rate for HINTS 5 Cycle 4 was 36.7%.

Accounting for patterns of historically observed nonresponse and noncoverage, HINTS used data from the American Community Survey conducted by the US Census Bureau and the National Health Interview Survey to calibrate the selection weights for participants. Each HINTS participant received a set of one full-sample weight and 50 replicate weights. The full-sample weights were computed by calculating household- and individual-level initial weights, accounting for historically observed patterns of non-response and calibrating individual-level weights to population counts. The replicate weights were computed according to the ‘delete one’ jackknife replication method. Because HINTS is conducted with a random sample of adults and weighted to the US population, these survey methods allow for inference of nationally representative estimates.

From 2019 onwards, HINTS included the following questions about the use of wearable devices for health monitoring:

- **WearableDevTrackHealth: B9.** In the past 12 months, have you used an electronic wearable device to monitor or track your health or activity? For example, a Fitbit, AppleWatch or Garmin Vivofit...

| <b>WearableDevTrackHealth</b> | <b>Value Label</b>                               |
|-------------------------------|--------------------------------------------------|
| -9                            | Missing data (Not Ascertained)                   |
| -7                            | Missing data (Web partial - Question Never Seen) |
| 1                             | Yes                                              |
| 2                             | No                                               |

- **FreqWearDevTrackHealth: B10.** In the past month, how often did you use a wearable device to track your health?

| <b>FreqWearDevTrackHealth</b> | <b>Value Label</b>                                |
|-------------------------------|---------------------------------------------------|
| -9                            | Missing data (Not Ascertained)                    |
| -7                            | Missing data (Web partial - Question Never Seen)  |
| -6                            | Missing data (Filter Missing)                     |
| -5                            | Multiple responses selected in error              |
| -2                            | Question answered in error (Commission Error)     |
| -1                            | Inapplicable, coded 1 in WearableDevTrackHealth   |
| 1                             | Everyday                                          |
| 2                             | Almost everyday                                   |
| 3                             | 1-2 times per week                                |
| 4                             | Less than once per week                           |
| 5                             | I did not use a wearable device in the past month |

- **WillingShareData\_HCP: B11a.** Would you be willing to share health data from your wearable device with your health care provider?

| <b>WillingShareData_HCP</b> | <b>Value Label</b>                               |
|-----------------------------|--------------------------------------------------|
| -9                          | Missing data (Not Ascertained)                   |
| -7                          | Missing data (Web partial - Question Never Seen) |
| -6                          | Missing data (Filter Missing)                    |
| -2                          | Question answered in error (Commission Error)    |
| -1                          | Inapplicable, coded 1 in WearableDevTrackHealth  |
| 1                           | Yes                                              |
| 2                           | No                                               |

**eFigure.** Use of Wearables Among US Adults With Cardiovascular Disease or Cardiovascular Risk Factors Before and After Adjustment for Sociodemographic Differences

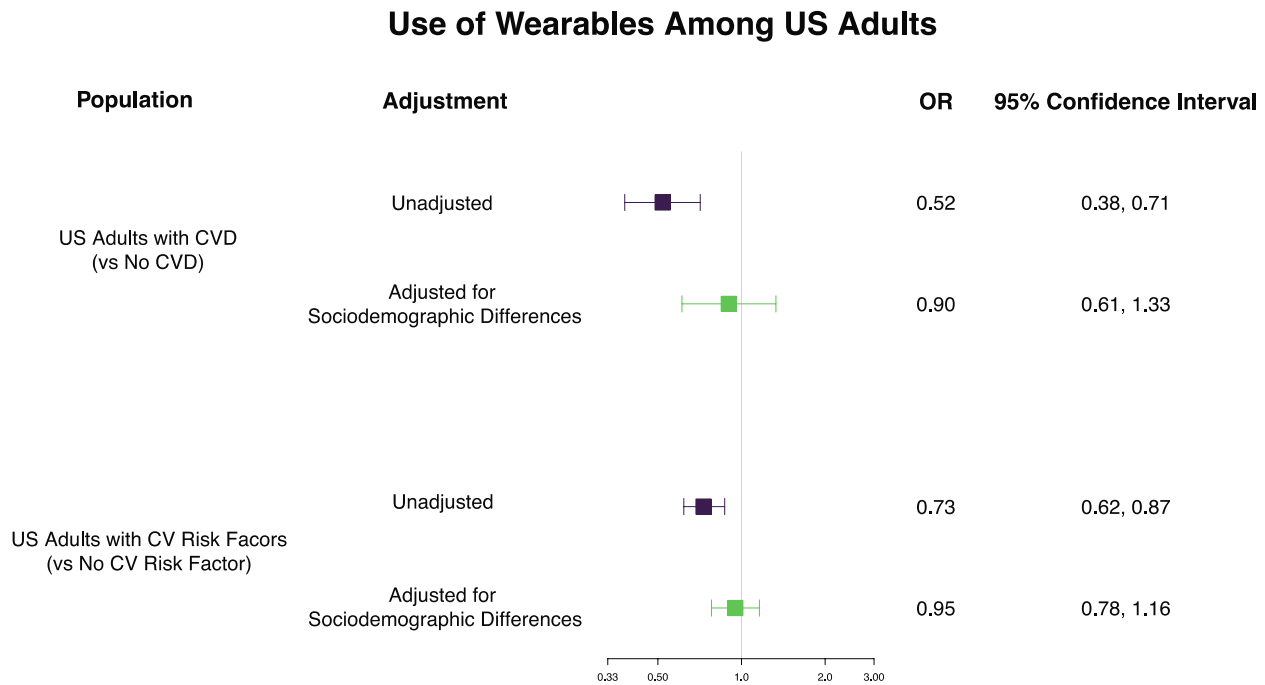

Abbreviations: CV, Cardiovascular; CVD, Cardiovascular Disease; OR, Odds Ratio; US, United States

**eTable 1.** Demographic Characteristics, Cardiovascular Disease, and Cardiovascular Risk Factors in Health Information National Trends Survey Respondents, 2019 and 2020

| Characteristic                        | Participants of HINTS, 2019 and 2020 (N=9303) |                              | Participants with CVD (N=933) |                              | Participants at risk of CVD (N=5185) |                              |
|---------------------------------------|-----------------------------------------------|------------------------------|-------------------------------|------------------------------|--------------------------------------|------------------------------|
|                                       | Number (%)                                    | Weighted Percentage (95% CI) | Number (%)                    | Weighted Percentage (95% CI) | Number (%)                           | Weighted Percentage (95% CI) |
| <b>Demographics</b>                   |                                               |                              |                               |                              |                                      |                              |
| <b>Age Group</b>                      |                                               |                              |                               |                              |                                      |                              |
| 18-49                                 | 2864 (31.4%)                                  | 50% (48% to 52%)             | 72 (7.82%)                    | 17% (13% to 23%)             | 1292 (25.3%)                         | 45% (42% to 47%)             |
| 50-64                                 | 2829 (31.0%)                                  | 29% (28% to 31%)             | 228 (24.8%)                   | 34% (20% to 40%)             | 1750 (34.3%)                         | 33% (31% to 35%)             |
| >65                                   | 3431 (37.6%)                                  | 21% (19% to 22%)             | 621 (67.4%)                   | 49% (43% to 54%)             | 2066 (40.4%)                         | 23% (21% to 24%)             |
| <b>Sex</b>                            |                                               |                              |                               |                              |                                      |                              |
| Male                                  | 3797 (41.8%)                                  | 49% (47% to 51%)             | 487 (53.3%)                   | 57% (51% to 63%)             | 2122 (41.6%)                         | 49% (47% to 52%)             |
| Female                                | 5277 (58.2%)                                  | 51% (49% to 53%)             | 427 (46.7%)                   | 43% (37% to 49%)             | 2976 (58.4%)                         | 51% (48% to 53%)             |
| <b>Race and Ethnicity</b>             |                                               |                              |                               |                              |                                      |                              |
| Non-Hispanic White                    | 5187 (62.2%)                                  | 63% (62% to 65%)             | 530 (67.5%)                   | 71% (65% to 76%)             | 2771 (59.3%)                         | 62% (60% to 64%)             |
| Non-Hispanic Black                    | 1158 (13.9%)                                  | 11% (10% to 12%)             | 103 (13.1%)                   | 10% (7% to 14%)              | 807 (17.3%)                          | 14% (12% to 15%)             |
| Hispanic                              | 1326 (15.9%)                                  | 17% (16% to 18%)             | 104 (13.2%)                   | 12% (8% to 17%)              | 742 (15.9%)                          | 17% (15% to 19%)             |
| Other                                 | 669 (8.0%)                                    | 8% (7% to 9%)                | 48 (6.11%)                    | 7% (4% to 11%)               | 353 (7.55%)                          | 7% (6% to 9%)                |
| <b>Cardiovascular Risk Factors</b>    |                                               |                              |                               |                              |                                      |                              |
| <b>CVD</b>                            | 933 (10.2%)                                   | 8% (7% to 9%)                | 933 (100%)                    | -                            | 0 (0%)                               | -                            |
| <b>Any Cardiovascular Risk Factor</b> | 6042 (67.0%)                                  | 62% (60% to 64%)             | 818 (88.2%)                   | 89% (86% to 91%)             | 5185 (100%)                          | -                            |
| <b>Hypertension</b>                   | 4088 (44.9%)                                  | 36% (34% to 38%)             | 723 (78.5%)                   | 76% (71% to 80%)             | 3344 (64.7%)                         | 55% (53% to 58%)             |
| <b>Diabetes Mellitus</b>              | 1974 (21.7%)                                  | 18% (16% to 19%)             | 406 (44.3%)                   | 43% (37% to 48%)             | 1561 (30.4%)                         | 26% (24% to 28%)             |
| <b>Obesity</b>                        | 3044 (33.8%)                                  | 34% (32% to 36%)             | 390 (42.7%)                   | 44% (38% to %50)             | 2643 (51.8%)                         | 56% (53% to 59%)             |
| <b>Cigarette Smoking</b>              | 1053 (11.5%)                                  | 13% (12% to 15%)             | 122 (13.4%)                   | 17% (12% to 22%)             | 916 (17.9%)                          | 22% (20% to 24%)             |
| <b>Socioeconomic Factors</b>          |                                               |                              |                               |                              |                                      |                              |
| <b>Education</b>                      |                                               |                              |                               |                              |                                      |                              |
| Post-Baccalaureate Degree             | 1692 (18.8%)                                  | 12% (11% to 13%)             | 113 (12.5%)                   | 7% (5% to 9%)                | 825 (16.3%)                          | 10% (9% to 11%)              |
| College Education                     | 5053 (56.1%)                                  | 58% (56% to 60%)             | 466 (51.7%)                   | 55% (48% to 62%)             | 2781 (55.0%)                         | 55% (52% to 57%)             |

|                            |                 |                     |                |                     |                 |                     |
|----------------------------|-----------------|---------------------|----------------|---------------------|-----------------|---------------------|
| Up to High School Graduate | 2258<br>(25.1%) | 31%<br>(29% to 32%) | 322<br>(35.7%) | 38%<br>(32% to 45%) | 1452<br>(28.7%) | 35%<br>(33% to 38%) |
| <b>Household Income</b>    |                 |                     |                |                     |                 |                     |
| >\$50,000                  | 4563<br>(55.3%) | 59%<br>(57% to 61%) | 321<br>(39.2%) | 37%<br>(31% to 43%) | 2364<br>(51.2%) | 55%<br>(53% to 57%) |
| \$20,000 to \$50,000       | 2155<br>(26.1%) | 24%<br>(23% to 26%) | 269<br>(32.8%) | 41%<br>(34% to 48%) | 1297<br>(28.1%) | 25%<br>(23% to 28%) |
| <\$20,000                  | 1528<br>(18.5%) | 17%<br>(15% to 18%) | 229<br>(28.0%) | 22%<br>(18% to 27%) | 959<br>(20.8%)  | 19%<br>(18% to 21%) |
| <b>Residence</b>           |                 |                     |                |                     |                 |                     |
| Metropolitan               | 8163<br>(87.8%) | 86%<br>(85% to 87%) | 801<br>(85.9%) | 86%<br>(82% to 89%) | 4502<br>(86.8%) | 84%<br>(82% to 86%) |
| Non-Metropolitan           | 1139<br>(12.2%) | 14%<br>(13% to 15%) | 132<br>(14.1%) | 14%<br>(11% to 18%) | 683<br>(13.2%)  | 16%<br>(14% to 18%) |

Abbreviations: CI, Confidence Intervals; CVD, Cardiovascular Disease; HINTS, Health Information National Trends Survey

**eTable 2.** Demographic Distribution of Wearable Use in Individuals With or at Risk of Cardiovascular Disease

| Characteristic                     | Individuals with CVD<br>(N=933) |                                                 |         | Individuals at risk of CVD<br>(N=5185) |                                                 |         |
|------------------------------------|---------------------------------|-------------------------------------------------|---------|----------------------------------------|-------------------------------------------------|---------|
|                                    | Number<br>(%) <sup>a</sup>      | Weighted<br>Percentage <sup>a</sup><br>(95% CI) | P Value | Number<br>(%) <sup>a</sup>             | Weighted<br>Percentage <sup>a</sup><br>(95% CI) | P Value |
| <b>Demographics</b>                |                                 |                                                 |         |                                        |                                                 |         |
| <b>Age Group</b>                   |                                 |                                                 |         |                                        |                                                 |         |
| 18-49                              | 30<br>(41.7%)                   | 34%<br>(19% to 52%)                             | 0.03    | 462<br>(35.8%)                         | 33%<br>(29% to 38%)                             | <0.001  |
| 50-64                              | 42<br>(18.7%)                   | 18%<br>(11% to 27%)                             |         | 433<br>(25.0%)                         | 24%<br>(22% to 27%)                             |         |
| >65                                | 92<br>(15.2%)                   | 12%<br>(9% to 17%)                              |         | 282<br>(13.9%)                         | 14%<br>(12% to 17%)                             |         |
| <b>Sex</b>                         |                                 |                                                 |         |                                        |                                                 |         |
| Male                               | 80<br>(16.8%)                   | 18%<br>(13% to 25%)                             | 0.92    | 437<br>(20.8%)                         | 25%<br>(21% to 28%)                             | 0.20    |
| Female                             | 82<br>(19.5%)                   | 18%<br>(12% to 24%)                             |         | 737<br>(25.0%)                         | 27%<br>(25% to 30%)                             |         |
| <b>Race and Ethnicity</b>          |                                 |                                                 |         |                                        |                                                 |         |
| Non-Hispanic White                 | 100<br>(19.1%)                  | 17%<br>(13% to 24%)                             | 0.53    | 683<br>(24.9%)                         | 28%<br>(25% to 31%)                             | 0.05    |
| Non-Hispanic Black                 | 21<br>(20.6%)                   | 26%<br>(11% to 49%)                             |         | 179<br>(22.3%)                         | 21%<br>(18% to 26%)                             |         |
| Hispanic                           | 15<br>(14.4%)                   | 24%<br>(11% to 44%)                             |         | 161<br>(21.9%)                         | 25%<br>(19% to 31%)                             |         |
| Other                              | 8<br>(17.4%)                    | 12%<br>(4% to 32%)                              |         | 99<br>(28.4%)                          | 27%<br>(19% to 36%)                             |         |
| <b>Cardiovascular Risk Factors</b> |                                 |                                                 |         |                                        |                                                 |         |
| <b>Hypertension</b>                | 124<br>(17.4%)                  | 18%<br>(13% to 24%)                             | 0.78    | 695<br>(21.0%)                         | 23%<br>(21% to 26%)                             | 0.007   |
| <b>Diabetes Mellitus</b>           | 67<br>(16.8%)                   | 13%<br>(8% to 19%)                              | 0.02    | 292<br>(18.9%)                         | 22%<br>(19% to 26%)                             | 0.04    |
| <b>Obesity</b>                     | 73<br>(18.9%)                   | 17%<br>(11% to 25%)                             | 0.60    | 658<br>(25.2%)                         | 28%<br>(25% to 31%)                             | 0.09    |
| <b>Cigarette Smoking</b>           | 12<br>(10.3%)                   | 5%<br>(2% to 10%)                               | <0.001  | 149<br>(16.4%)                         | 21%<br>(17% to 26%)                             | 0.02    |

| Socioeconomic Factors                                                                                  |                |                     |        |                 |                     |        |
|--------------------------------------------------------------------------------------------------------|----------------|---------------------|--------|-----------------|---------------------|--------|
| <b>Education</b>                                                                                       |                |                     |        |                 |                     |        |
| Post-Baccalaureate Degree                                                                              | 33<br>(29.7%)  | 46%<br>(32% to 60%) | <0.001 | 289<br>(35.3%)  | 41%<br>(34% to 49%) | <0.001 |
| College Education                                                                                      | 90<br>(19.5%)  | 19%<br>(14% to 27%) |        | 719<br>(26.1%)  | 31%<br>(27% to 34%) |        |
| Up to High School Graduate                                                                             | 36<br>(11.5%)  | 11%<br>(6% to 19%)  |        | 165<br>(11.5%)  | 15%<br>(11% to 18%) |        |
| <b>Household Income</b>                                                                                |                |                     |        |                 |                     |        |
| >\$50,000                                                                                              | 86<br>(26.9%)  | 31%<br>(24% to 39%) | <0.001 | 800<br>(34.2%)  | 34%<br>(31% to 38%) | <0.001 |
| \$20,000 to \$50,000                                                                                   | 39<br>(14.9%)  | 12%<br>(6% to 21%)  |        | 209<br>(16.3%)  | 20%<br>(16% to 25%) |        |
| <\$20,000                                                                                              | 25<br>(11.1%)  | 11%<br>(6% to 18%)  |        | 84<br>(8.9%)    | 13%<br>(9% to 17%)  |        |
| <b>Residence</b>                                                                                       |                |                     |        |                 |                     |        |
| Metropolitan                                                                                           | 151<br>(19.2%) | 19%<br>(15% to 25%) | 0.05   | 1071<br>(24.0%) | 26%<br>(24% to 29%) | 0.21   |
| Non-Metropolitan                                                                                       | 17<br>(13.1%)  | 10%<br>(5% to 20%)  |        | 117<br>(17.3%)  | 23%<br>(18% to 28%) |        |
| <sup>a</sup> Percentages represent row percentages (Percentage of participants reporting wearable use) |                |                     |        |                 |                     |        |

Abbreviations: CI, Confidence Intervals; CVD, Cardiovascular Disease; HINTS, Health Information National Trends Survey

**eTable 3.** Frequency of Use in Participants Using Wearable Devices

| Frequency of Wearable Use | Participants of HINTS, 2019 and 2020 (N=2368) |                              | Participants with CVD (N=168) |                              | Participants at risk of CVD (N=1188) |                              |
|---------------------------|-----------------------------------------------|------------------------------|-------------------------------|------------------------------|--------------------------------------|------------------------------|
|                           | Number (%)                                    | Weighted Percentage (95% CI) | Number (%)                    | Weighted Percentage (95% CI) | Number (%)                           | Weighted Percentage (95% CI) |
| Everyday                  | 1148 (49.0%)                                  | 49% (45% to 53%)             | 70 (41.9%)                    | 38% (26% to 50%)             | 586 (50.0%)                          | 48% (43% to 53%)             |
| Almost Everyday           | 499 (21.3%)                                   | 23% (20% to 26%)             | 33 (19.8%)                    | 24% (14% to 36%)             | 244 (20.8%)                          | 23% (19% to 27%)             |
| 1-2 times per week        | 218 (9.31%)                                   | 9% (7% to 11%)               | 13 (7.78%)                    | 8% (3% to 16%)               | 97 (8.28%)                           | 8% (6% to 11%)               |
| Less than once per week   | 174 (7.43%)                                   | 7% (5% to 9%)                | 15 (8.98%)                    | 5% (2% to 10%)               | 91 (7.76%)                           | 8% (5% to 12%)               |
| Not in the last month     | 303 (12.9%)                                   | 12% (10% to 15%)             | 36 (21.6%)                    | 25% (13% to 40%)             | 154 (13.1%)                          | 13% (10% to 17%)             |

Abbreviations: CI, Confidence Intervals; CVD, Cardiovascular Disease; HINTS, Health Information National Trends Survey



**eTable 4.** Univariable Demographic Predictors of Wearable Device Use in Individuals With Cardiovascular Disease

| Characteristic                     | Individuals with CVD |         | Individuals at risk of CVD |         |
|------------------------------------|----------------------|---------|----------------------------|---------|
|                                    | Odds Ratio           | P-Value | Odds Ratio                 | P-Value |
| <b>Demographics</b>                |                      |         |                            |         |
| <b>Age Group</b>                   |                      |         |                            |         |
| 18-49                              | Reference            |         | Reference                  |         |
| 50-64                              | 0.42<br>(0.17-1.06)  | 0.07    | 0.65<br>(0.51-0.84)        | 0.001   |
| >65                                | 0.28<br>(0.13-0.61)  | 0.002   | 0.34<br>(0.27-0.42)        | <0.001  |
| <b>Sex</b>                         |                      |         |                            |         |
| Male                               | Reference            |         | Reference                  |         |
| Female                             | 0.97<br>(0.55-1.71)  | 0.92    | 1.16<br>(0.92-1.46)        | 0.20    |
| <b>Race and Ethnicity</b>          |                      |         |                            |         |
| Non-Hispanic White                 | Reference            |         | Reference                  |         |
| Non-Hispanic Black                 | 1.65<br>(0.58-4.69)  | 0.35    | 0.68<br>(0.52-0.89)        | 0.007   |
| Hispanic                           | 1.48<br>(0.55-3.97)  | 0.44    | 0.83<br>(0.58-1.19)        | 0.32    |
| Other                              | 0.66<br>(0.18-2.43)  | 0.53    | 0.93<br>(0.61-1.43)        | 0.75    |
| <b>Cardiovascular Risk Factors</b> |                      |         |                            |         |
| <b>Hypertension</b>                | 0.91<br>(0.48-1.74)  | 0.78    | 0.75<br>(0.61-0.92)        | 0.007   |
| <b>Diabetes Mellitus</b>           | 0.52<br>(0.30-0.92)  | 0.03    | 0.76<br>(0.59-0.99)        | 0.04    |
| <b>Obesity</b>                     | 0.86<br>(0.48-1.53)  | 0.61    | 1.24<br>(0.97-1.57)        | 0.09    |
| <b>Cigarette Smoking</b>           | 0.19<br>(0.09-0.41)  | <0.001  | 0.73<br>(0.55-0.97)        | 0.03    |
| <b>Socioeconomic Factors</b>       |                      |         |                            |         |
| <b>Education</b>                   |                      |         |                            |         |
| Post-Baccalaureate Degree          | Reference            |         | Reference                  |         |
| College Education                  | 0.29<br>(0.14-0.57)  | 0.001   | 0.63<br>(0.44-0.89)        | 0.01    |
| Up to High School Graduate         | 0.14<br>(0.06-0.31)  | <0.001  | 0.24<br>(0.17-0.35)        | <0.001  |
| <b>Household Income</b>            |                      |         |                            |         |
| >\$50,000                          | Reference            |         | Reference                  |         |
| \$20,000 to \$50,000               | 0.29<br>(0.14-0.63)  | 0.002   | 0.47<br>(0.35-0.63)        | <0.001  |
| <\$20,000                          | 0.27<br>(0.14-0.53)  | <0.001  | 0.28<br>(0.19-0.41)        | <0.001  |
| <b>Residence</b>                   |                      |         |                            |         |
| Metropolitan                       | Reference            |         | Reference                  |         |
| Non-Metropolitan                   | 0.49<br>(0.22-1.09)  | 0.08    | 0.81<br>(0.58-1.14)        | 0.24    |

Abbreviations: CI, Confidence Intervals; CVD, Cardiovascular Disease; HINTS, Health Information National Trends Survey

**eTable 5.** Multivariable Models for Wearable Device Use in Individuals With Cardiovascular Disease

| Characteristic                     | Model 1 <sup>a</sup> |         | Model 2 <sup>b</sup> |         | Model 3 <sup>c</sup> |         |
|------------------------------------|----------------------|---------|----------------------|---------|----------------------|---------|
|                                    | Odds Ratio (95% CI)  | P-Value | Odds Ratio (95% CI)  | P-Value | Odds Ratio (95% CI)  | P-Value |
| <b>Demographics</b>                |                      |         |                      |         |                      |         |
| <b>Age Group</b>                   |                      |         |                      |         |                      |         |
| 18-49                              | Reference            |         |                      |         |                      |         |
| 50-64                              | 0.42<br>(0.16, 1.09) | 0.08    | 0.62<br>(0.23, 1.69) | 0.30    | 0.44<br>(0.18, 1.10) | 0.08    |
| >65                                | 0.27<br>(0.12, 0.63) | 0.003   | 0.26<br>(0.09, 0.72) | 0.01    | 0.22<br>(0.09, 0.56) | 0.002   |
| <b>Sex</b>                         |                      |         |                      |         |                      |         |
| Male                               | Reference            |         |                      |         |                      |         |
| Female                             | 0.84<br>(0.46, 1.53) | 0.60    | 0.95<br>(0.54, 1.69) | 0.90    | 1.15<br>(0.61, 2.16) | 0.70    |
| <b>Race and Ethnicity</b>          |                      |         |                      |         |                      |         |
| Non-Hispanic White                 | Reference            |         |                      |         |                      |         |
| Non-Hispanic Black                 | 1.42<br>(0.49, 4.06) | 0.50    | 2.19<br>(0.78, 6.13) | 0.14    | 3.01<br>(1.04, 8.75) | 0.05    |
| Hispanic                           | 1.05<br>(0.41, 2.67) | >0.9    | 1.13<br>(0.40, 3.19) | 0.80    | 1.54<br>(0.44, 5.39) | 0.50    |
| Other                              | 0.46<br>(0.11, 1.89) | 0.30    | 0.80<br>(0.18, 3.65) | 0.80    | 0.66<br>(0.15, 2.95) | 0.60    |
| <b>Cardiovascular Risk Factors</b> |                      |         |                      |         |                      |         |
| Hypertension                       | —                    | —       | 1.35<br>(0.53, 3.42) | 0.50    | 2.11<br>(0.90, 4.97) | 0.09    |
| Diabetes Mellitus                  | —                    | —       | 0.43<br>(0.22, 0.86) | 0.02    | 0.42<br>(0.18, 0.97) | 0.04    |
| Obesity                            | —                    | —       | 0.72<br>(0.32, 1.61) | 0.40    | 0.70<br>(0.31, 1.55) | 0.40    |
| Cigarette Smoking                  | —                    | —       | 0.13<br>(0.04, 0.40) | <0.001  | 0.09<br>(0.03, 0.29) | <0.001  |
| <b>Socioeconomic Factors</b>       |                      |         |                      |         |                      |         |
| <b>Education</b>                   |                      |         |                      |         |                      |         |
| Post-Baccalaureate Degree          | —                    | —       | —                    | —       | Reference            |         |
| College Education                  | —                    | —       | —                    | —       | 0.39<br>(0.18, 0.84) | 0.02    |
| Up to High School Graduate         | —                    | —       | —                    | —       | 0.27<br>(0.11, 0.63) | 0.004   |

| <b>Household Income</b>                                                                                                                                                                                                                                                                                                                                                                                                                                                                                                                                                                                                                                                     |   |   |   |   |                      |       |
|-----------------------------------------------------------------------------------------------------------------------------------------------------------------------------------------------------------------------------------------------------------------------------------------------------------------------------------------------------------------------------------------------------------------------------------------------------------------------------------------------------------------------------------------------------------------------------------------------------------------------------------------------------------------------------|---|---|---|---|----------------------|-------|
| >\$50,000                                                                                                                                                                                                                                                                                                                                                                                                                                                                                                                                                                                                                                                                   | — | — | — | — | Reference            |       |
| \$20,000 to \$50,000                                                                                                                                                                                                                                                                                                                                                                                                                                                                                                                                                                                                                                                        | — | — | — | — | 0.26<br>(0.12, 0.57) | 0.001 |
| <\$20,000                                                                                                                                                                                                                                                                                                                                                                                                                                                                                                                                                                                                                                                                   | — | — | — | — | 0.29<br>(0.11, 0.76) | 0.01  |
| <b>Residence</b>                                                                                                                                                                                                                                                                                                                                                                                                                                                                                                                                                                                                                                                            |   |   |   |   |                      |       |
| Metropolitan                                                                                                                                                                                                                                                                                                                                                                                                                                                                                                                                                                                                                                                                | — | — | — | — | Reference            |       |
| Non-Metropolitan                                                                                                                                                                                                                                                                                                                                                                                                                                                                                                                                                                                                                                                            | — | — | — | — | 0.60<br>(0.25, 1.46) | 0.30  |
| <p><sup>a</sup> Model 1 represents a survey-weighted, multivariable logistic regression model adjusting for demographic characteristics (age, sex, and race and ethnicity).</p> <p><sup>b</sup> Model 2 represents a survey-weighted, multivariable logistic regression model adjusting for demographic characteristics and cardiovascular risk factors (hypertension, diabetes mellitus, obesity, cigarette smoking)</p> <p><sup>c</sup> Model 3 represents a survey-weighted, multivariable logistic regression model adjusting for demographic characteristics, cardiovascular risk factors, and socioeconomic features (education, household income, and residence)</p> |   |   |   |   |                      |       |

Abbreviations: CI, Confidence Intervals; CVD, Cardiovascular Disease; HINTS, Health Information National Trends Survey

**eTable 6.** Multivariable Models for Wearable Device Use in Individuals at Risk of Cardiovascular Disease

| Characteristic                     | Model 1 <sup>a</sup> |         | Model 2 <sup>b</sup> |         | Model 3 <sup>c</sup> |         |
|------------------------------------|----------------------|---------|----------------------|---------|----------------------|---------|
|                                    | Odds Ratio (95% CI)  | P-Value | Odds Ratio (95% CI)  | P-Value | Odds Ratio (95% CI)  | P-Value |
| <b>Demographics</b>                |                      |         |                      |         |                      |         |
| <b>Age Group</b>                   |                      |         |                      |         |                      |         |
| 18-49                              | Reference            |         |                      |         |                      |         |
| 50-64                              | 0.66<br>(0.51, 0.85) | 0.002   | 0.66<br>(0.50, 0.86) | 0.003   | 0.70<br>(0.53, 0.94) | 0.02    |
| >65                                | 0.32<br>(0.25, 0.40) | <0.001  | 0.30<br>(0.22, 0.40) | <0.001  | 0.35<br>(0.26, 0.48) | <0.001  |
| <b>Sex</b>                         |                      |         |                      |         |                      |         |
| Male                               | Reference            |         |                      |         |                      |         |
| Female                             | 1.26<br>(0.99, 1.60) | 0.06    | 1.23<br>(0.97, 1.55) | 0.10    | 1.34<br>(1.05, 1.71) | 0.02    |
| <b>Race and Ethnicity</b>          |                      |         |                      |         |                      |         |
| Non-Hispanic White                 | Reference            |         |                      |         |                      |         |
| Non-Hispanic Black                 | 0.60<br>(0.45, 0.79) | <0.001  | 0.61<br>(0.45, 0.81) | 0.001   | 0.74<br>(0.52, 1.06) | 0.10    |
| Hispanic                           | 0.70<br>(0.48, 1.03) | 0.07    | 0.67<br>(0.46, 0.99) | 0.05    | 0.73<br>(0.48, 1.12) | 0.20    |
| Other                              | 0.81<br>(0.53, 1.26) | 0.40    | 0.83<br>(0.53, 1.31) | 0.40    | 0.87<br>(0.54, 1.41) | 0.60    |
| <b>Cardiovascular Risk Factors</b> |                      |         |                      |         |                      |         |
| <b>Hypertension</b>                | —                    | —       | 0.93<br>(0.71, 1.24) | 0.60    | 0.86<br>(0.65, 1.14) | 0.30    |
| <b>Diabetes Mellitus</b>           | —                    | —       | 0.89<br>(0.67, 1.18) | 0.40    | 0.96<br>(0.70, 1.30) | 0.80    |
| <b>Obesity</b>                     | —                    | —       | 0.87<br>(0.66, 1.16) | 0.40    | 0.92<br>(0.69, 1.23) | 0.60    |
| <b>Cigarette Smoking</b>           | —                    | —       | 0.57<br>(0.41, 0.78) | <0.001  | 0.68<br>(0.48, 0.94) | 0.02    |
| <b>Socioeconomic Factors</b>       |                      |         |                      |         |                      |         |
| <b>Education</b>                   |                      |         |                      |         |                      |         |
| Post-Baccalaureate Degree          | —                    | —       | —                    | —       | Reference            |         |
| College Education                  | —                    | —       | —                    | —       | 0.76<br>(0.51, 1.13) | 0.20    |
| Up to High School Graduate         | —                    | —       | —                    | —       | 0.35<br>(0.24, 0.52) | <0.001  |

| <b>Household Income</b>                                                                                                                                                                                                                                                                                                                                                                                                                                                                                                                                                                                                                                                     |   |   |   |   |                      |        |
|-----------------------------------------------------------------------------------------------------------------------------------------------------------------------------------------------------------------------------------------------------------------------------------------------------------------------------------------------------------------------------------------------------------------------------------------------------------------------------------------------------------------------------------------------------------------------------------------------------------------------------------------------------------------------------|---|---|---|---|----------------------|--------|
| >\$50,000                                                                                                                                                                                                                                                                                                                                                                                                                                                                                                                                                                                                                                                                   | — | — | — | — | Reference            |        |
| \$20,000 to \$50,000                                                                                                                                                                                                                                                                                                                                                                                                                                                                                                                                                                                                                                                        | — | — | — | — | 0.64<br>(0.48, 0.87) | 0.005  |
| <\$20,000                                                                                                                                                                                                                                                                                                                                                                                                                                                                                                                                                                                                                                                                   | — | — | — | — | 0.42<br>(0.29, 0.60) | <0.001 |
| <b>Residence</b>                                                                                                                                                                                                                                                                                                                                                                                                                                                                                                                                                                                                                                                            |   |   |   |   |                      |        |
| Metropolitan                                                                                                                                                                                                                                                                                                                                                                                                                                                                                                                                                                                                                                                                | — | — | — | — | Reference            |        |
| Non-Metropolitan                                                                                                                                                                                                                                                                                                                                                                                                                                                                                                                                                                                                                                                            | — | — | — | — | 0.81<br>(0.57, 1.15) | 0.20   |
| <p><sup>a</sup> Model 1 represents a survey-weighted, multivariable logistic regression model adjusting for demographic characteristics (age, sex, and race and ethnicity).</p> <p><sup>b</sup> Model 2 represents a survey-weighted, multivariable logistic regression model adjusting for demographic characteristics and cardiovascular risk factors (hypertension, diabetes mellitus, obesity, cigarette smoking)</p> <p><sup>c</sup> Model 3 represents a survey-weighted, multivariable logistic regression model adjusting for demographic characteristics, cardiovascular risk factors, and socioeconomic features (education, household income, and residence)</p> |   |   |   |   |                      |        |

Abbreviations: CI, Confidence Intervals; HINTS, Health Information National Trends Survey

**eTable 7.** Distribution of Demographic Characteristics, Cardiovascular Risk Factors, and Socioeconomic Features Based on Willingness to Share Wearable Device Health Data With Clinicians in Participants With or at Risk of Cardiovascular Disease

| Characteristic                     | Participants with CVD |                 |         | Participants at risk of CVD |                 |         |
|------------------------------------|-----------------------|-----------------|---------|-----------------------------|-----------------|---------|
|                                    | Not Willing (N=27)    | Willing (N=137) | P-Value | Not Willing (N=227)         | Willing (N=945) | P-Value |
| <b>Demographics</b>                |                       |                 |         |                             |                 |         |
| <b>Age Group</b>                   |                       |                 | 0.62    |                             |                 | 0.89    |
| 18-49                              | 4 (13.3%)             | 26 (86.7%)      |         | 82 (17.9%)                  | 377 (82.1%)     |         |
| 50-64                              | 9 (21.4%)             | 33 (78.6%)      |         | 92 (21.5%)                  | 335 (78.5%)     |         |
| >65                                | 13 (14.6%)            | 76 (85.4%)      |         | 48 (17.4%)                  | 228 (82.6%)     |         |
| <b>Sex</b>                         |                       |                 | 0.61    |                             |                 | 0.24    |
| Male                               | 12 (15%)              | 68 (85%)        |         | 75 (17.4%)                  | 357 (82.6%)     |         |
| Female                             | 15 (19%)              | 64 (81%)        |         | 148 (20.4%)                 | 579 (79.6%)     |         |
| <b>Race and Ethnicity</b>          |                       |                 | 0.36    |                             |                 | 0.47    |
| Non-Hispanic White                 | 15 (15.3%)            | 83 (84.7%)      |         | 117 (17.3%)                 | 559 (82.7%)     |         |
| Non-Hispanic Black                 | 1 (4.8%)              | 20 (95.2%)      |         | 28 (15.9%)                  | 148 (84.1%)     |         |
| Hispanic                           | 2 (13.3%)             | 13 (86.7%)      |         | 36 (22.6%)                  | 123 (77.4%)     |         |
| Other                              | 3 (37.5%)             | 5 (62.5%)       |         | 26 (26.5%)                  | 72 (73.5%)      |         |
| <b>Cardiovascular Risk Factors</b> |                       |                 |         |                             |                 |         |
| <b>Hypertension</b>                |                       |                 | 0.96    |                             |                 | 0.31    |
| No                                 | 9 (22.5%)             | 31 (77.5%)      |         | 105 (21.7%)                 | 379 (78.3%)     |         |
| Yes                                | 18 (14.8%)            | 104 (85.2%)     |         | 122 (17.8%)                 | 565 (82.2%)     |         |
| <b>Diabetes Mellitus</b>           |                       |                 | 0.69    |                             |                 | 0.74    |
| No                                 | 15 (15.5%)            | 82 (84.5%)      |         | 171 (19.4%)                 | 709 (80.6%)     |         |
| Yes                                | 12 (18.5%)            | 53 (81.5%)      |         | 56 (19.4%)                  | 232 (80.6%)     |         |
| <b>Obesity</b>                     |                       |                 | 0.33    |                             |                 | 0.51    |
| No                                 | 14 (15.6%)            | 76 (84.4%)      |         | 104 (20.6%)                 | 402 (79.4%)     |         |
| Yes                                | 12 (16.7%)            | 60 (83.3%)      |         | 118 (18.1%)                 | 534 (81.9%)     |         |
| <b>Cigarette Smoking</b>           |                       |                 | 0.74    |                             |                 | 0.85    |
| No                                 | 25 (16.8%)            | 124 (83.2%)     |         | 189 (18.6%)                 | 827 (81.4%)     |         |
| Yes                                | 1 (9.1%)              | 10 (90.9%)      |         | 34 (23%)                    | 114 (77%)       |         |
| <b>Socioeconomic Factors</b>       |                       |                 |         |                             |                 |         |
| <b>Education</b>                   |                       |                 | 0.81    |                             |                 | 0.10    |
| Post-Baccalaureate Degree          | 2 (6.2%)              | 30 (93.8%)      |         | 55 (19.2%)                  | 232 (80.8%)     |         |
| College Education                  | 15 (16.9%)            | 74 (83.1%)      |         | 124 (17.4%)                 | 587 (82.6%)     |         |
| Up to High School Graduate         | 6 (17.1%)             | 29 (82.9%)      |         | 44 (27.5%)                  | 116 (72.5%)     |         |

|                         |            |            |      |             |             |      |
|-------------------------|------------|------------|------|-------------|-------------|------|
| <b>Household Income</b> |            |            | 0.67 |             |             | 0.39 |
| >\$50,000               | 13 (15.1%) | 73 (84.9%) |      | 135 (17%)   | 658 (83%)   |      |
| \$20,000 to \$50,000    | 5 (12.8%)  | 34 (87.2%) |      | 52 (25.1%)  | 155 (74.9%) |      |
| <\$20,000               | 4 (17.4%)  | 19 (82.6%) |      | 14 (17.3%)  | 67 (82.7%)  |      |
| <b>Residence</b>        |            |            | 0.08 |             |             | 0.73 |
| Metropolitan            | 25 (17%)   | 122 (83%)  |      | 204 (19.3%) | 852 (80.7%) |      |
| Non-Metropolitan        | 2 (11.8%)  | 15 (88.2%) |      | 23 (19.8%)  | 93 (80.2%)  |      |

Abbreviations: CI, Confidence Intervals; CVD, Cardiovascular Disease
