# Supplementary material for: Use of Wearable Devices in Individuals With or at Risk for Cardiovascular Disease in the US, 2019 to 2020
Source: PubMed Central journal article supplement (PMC10248745; doi:10.1001/jamanetworkopen.2023.16634), 2023-06-07
Supplement: jamanetwopen-e2316634-s002.pdf [file jamanetwopen-e2316634-s002.pdf]

## Data Sharing Statement

Dhingra. Use of Wearable Devices in Individuals With or at Risk for Cardiovascular Disease in the US, 2019 to 2020. *JAMA Netw Open*. Published June 07, 2023.

doi:10.1001/jamanetworkopen.2023.16634

### Data

**Data available:** Yes

**Data types:** Deidentified participant data

**How to access data:** The data are available from the HINTS survey from NCHS directly and our code will be made available

**When available:** With publication

### Supporting Documents

**Document types:** Statistical/analytic code

**How to access documents:** [rohan.khera@yale.edu](mailto:rohan.khera@yale.edu)

**When available:** With publication

### Additional Information

**Who can access the data:** Researchers whose proposed use of the data has been approved

**Types of analyses:** Data will be available from NCHS directly - available for public use

**Mechanisms of data availability:** Data will be available from NCHS directly - available for public use

**Any additional restrictions:** None
